# Supplementary material
Source: Springer Nature journal article supplement (https://www.springermedizin.de/resource/supplementary/12885_2013_4133_MOESM13_ESM.pdf/9465518)

(A)

SORBS2

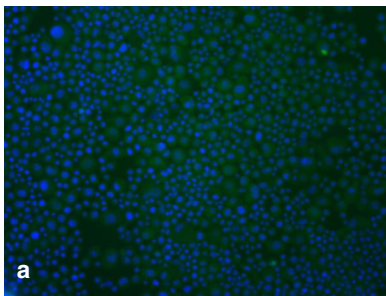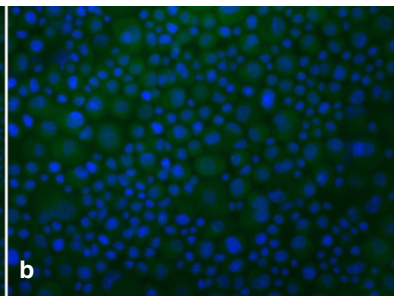p16<sup>INK4A</sup>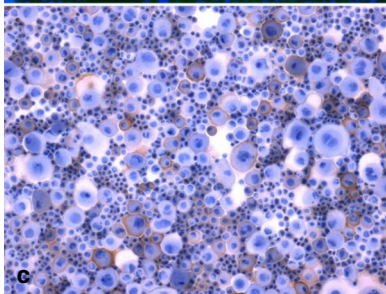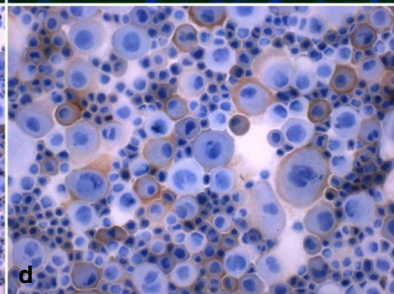

(B)

SORBS2

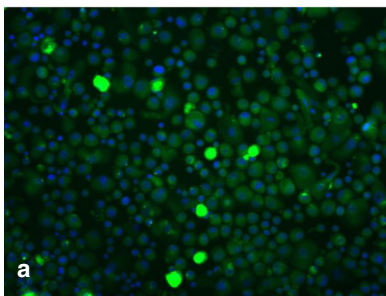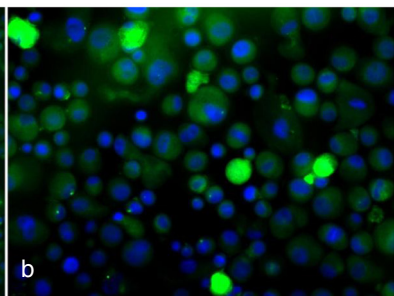p16<sup>INK4A</sup>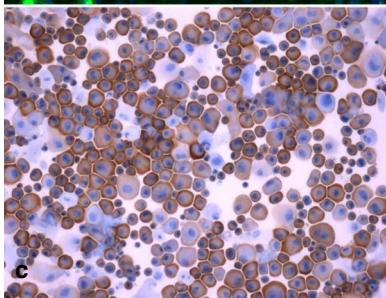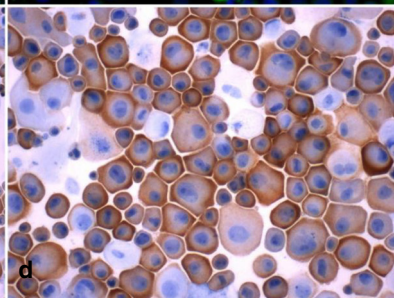

Supplement: MOESM13 [file 9465518]
